# Supplementary material
Source: publisher figshare collection journal article supplement (https://acs.figshare.com/ndownloader/files/7895980)
Supplement: Supplementary file 1 [file 7895980]

**Supporting Information to**

**Polymerization-Induced Self-Assembly (PISA) -Control over the**

**Morphology of  $^{19}\text{F}$ -containing Polymeric Nano-objects for Cell**

**Uptake and Tracking**

Wei Zhao<sup>1,2</sup>, Hang T. Ta<sup>1,2</sup>, Cheng Zhang,<sup>1,2</sup> Andrew K. Whittaker<sup>1,2,\*</sup>

<sup>1</sup>Australian Institute for Bioengineering and Nanotechnology, The University of Queensland,  
Brisbane, St Lucia QLD 4072, Australia

<sup>2</sup>ARC Centre of Excellence in Convergent Bio-Nano Science and Technology

\*Correspondence to: A. Whittaker (E-mail: [a.whittaker@uq.edu.au](mailto:a.whittaker@uq.edu.au))

**Table S1.**  $T_1$  and  $T_2$  relaxation times in water of poly(OEGA-*co*-TFEA) with different fluorine contents at a polymer concentration of 20 mg mL<sup>-1</sup> at 25 °C.

| Entry | [OEGA] <sub>0</sub> :[TFEA] <sub>0</sub><br>feed ratio | <sup>19</sup> F content (wt.%) | $T_1$ (ms) | $T_2$ (ms) |
|-------|--------------------------------------------------------|--------------------------------|------------|------------|
| 1     | 5:1                                                    | 2.22                           | 550.6      | 209.2      |
| 2     | 4:1                                                    | 2.68                           | 534.6      | 183.0      |
| 3     | 3:1                                                    | 3.6                            | 516.3      | 158.2      |
| 4     | 2:1                                                    | 5.09                           | 504.2      | 136.7      |
| 5     | 1:1                                                    | 8.75                           | 436.8      | 70.5       |
| 6     | 1:2                                                    | 13.91                          | 414.7      | 26.4       |

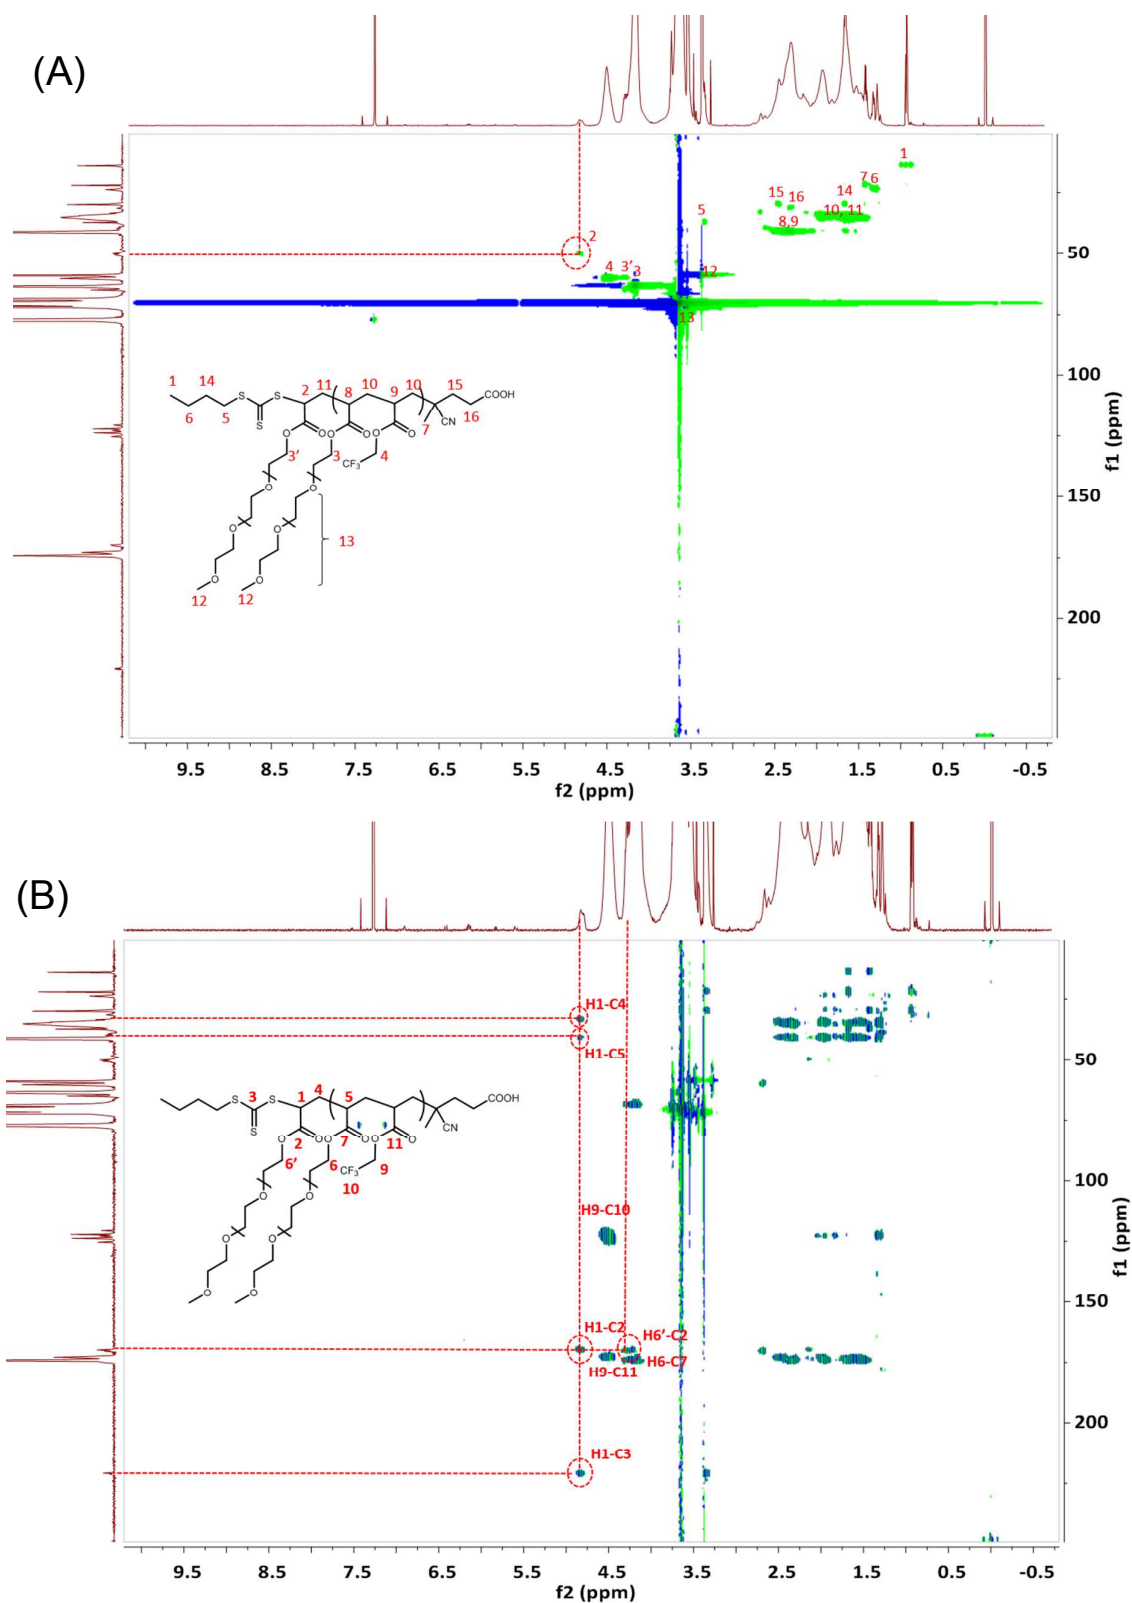

**Figure S1.** (A)  $^1\text{H}$ - $^{13}\text{C}$  HSQC spectrum and (B)  $^1\text{H}$ - $^{13}\text{C}$  HMBC spectrum of poly((OEGA-*co*-TFEA) macro CTA in  $\text{CDCl}_3$ . The red circles highlight the correlations that are related to trithiocarbonate group and its neighboring carbon and proton.

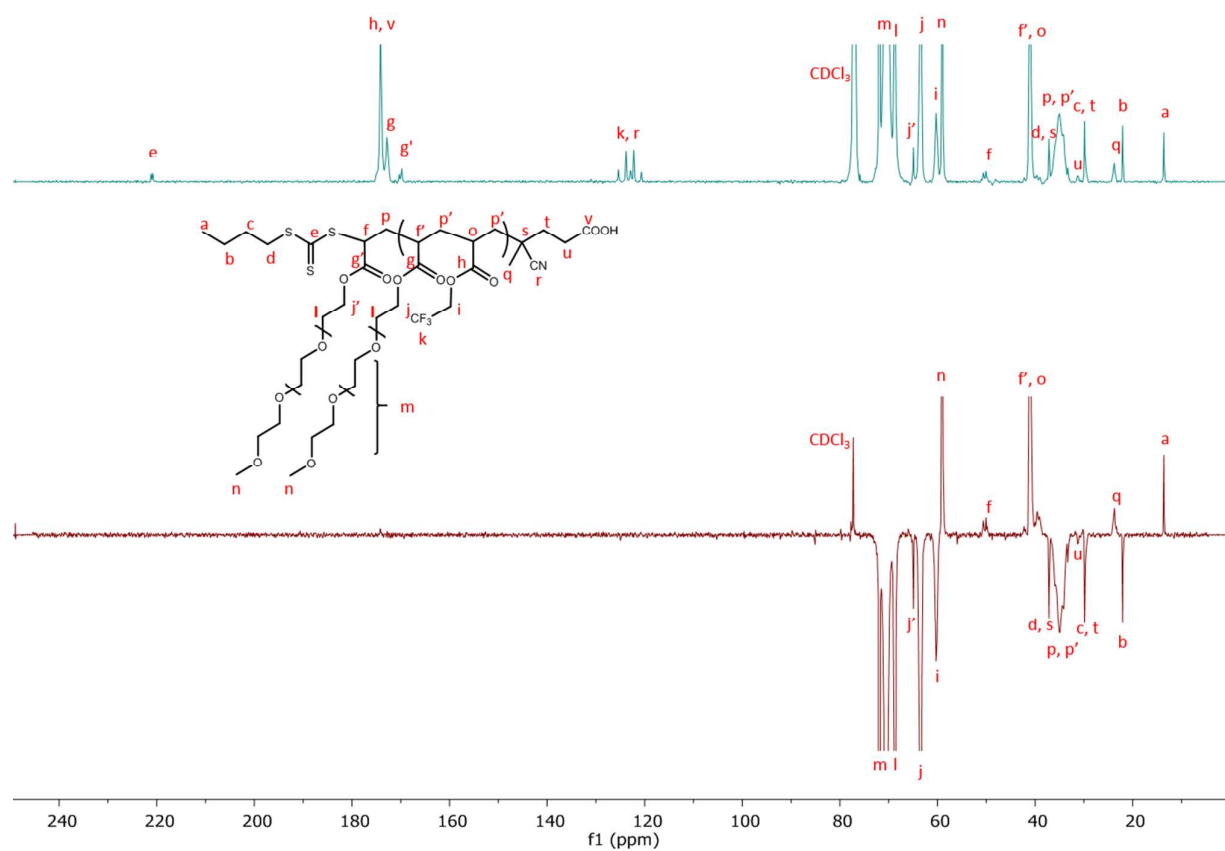

**Figure S2.** DEPT-135  $^{13}\text{C}$  NMR spectrum of poly(PEGA-*co*-TFEA) macro CTA in  $\text{CDCl}_3$ .

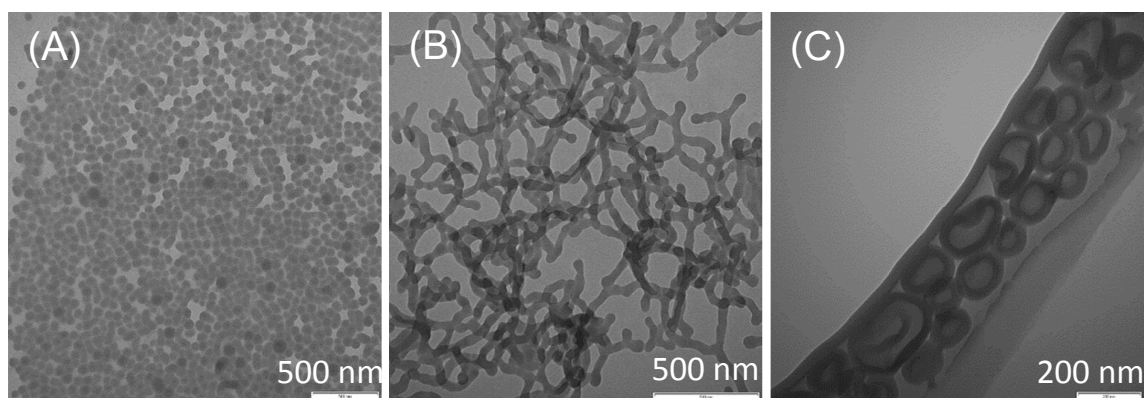

**Figure S3.** TEM images of nano-objects prepared with different polymerization times after conjugation with Cy5.5 dye: (A) 3h, (B) 5h and (C) 7h.
